# Supplementary material
Source: Research Square preprint supplement (doi:10.21203/rs.3.rs-9342602/v1)
Supplement: Supplementary file 1 [file 6687f57fbcf5c89a470a9d3f.docx]

**Mesoporous Silica Nanoparticles Confer Broad-Spectrum Disease Resistance in Rice via the OsERF3-OsRBOHE-ROS Pathway**

Yaling Zhaoa,b#, Shunkang Zhoua,d#, Guotao Hea#, Meng Yanga,b#, Ziyi Lia, Simin Liua, Gufeng Yuana,Yongqi Huanga*,* Wei Zhangc, Yuhao Yangc, Yi Xuc, Baoshan Chena,b, Huihua Tana,b, Wenwei Tanga,b, Yongqiang Hea,b, Wen Lia,b, Yanmei Liua, Tong Zhangd*, Wenxiu Qiuc*, Ying Zhouc,e*

aGuangxi Key Laboratory of Agro-environment and Agro-product Safety, College of Agriculture, Guangxi University, Nanning, 530004, China.

bState Key Laboratory for Conservation and Utilization of Subtropical Agro-bioresources, College of Agriculture, Guangxi University, Nanning, 530004, China.

cCollege of Life Science and Health, Wuhan University of Science and Technology, Wuhan, Hubei, 430081, China.

dGuangdong Province Key Laboratory of Microbial Signals and Disease Control, College of Plant Protection, South China Agricultural University, Guangzhou, 510624, China.

eWuhan Greenfafa Institute of Novel Genechip R&D Co., Ltd., Wuhan, 430070, China.

#These authors contribute equally to this work.

*Author to whom correspondence should be addressed: Ying Zhou ([18062565621@163.com](mailto:18062565621@163.com)); Wenxiu Qiu ([wx_qiu1816@163.com](mailto:wx_qiu1816@163.com)); Tong Zhang (zhangtong@scau.edu.cn).


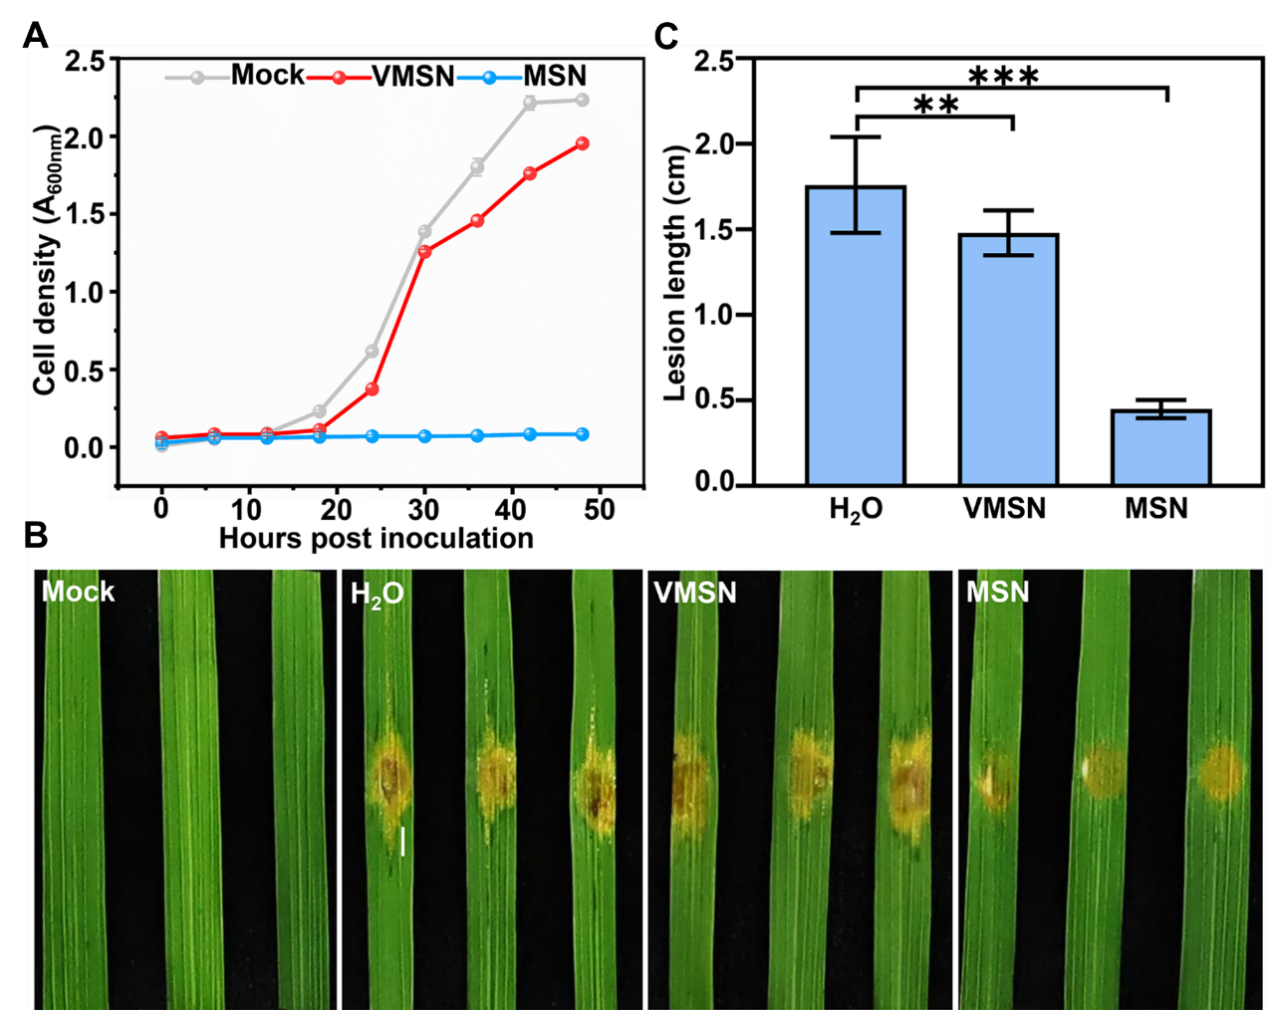


**Figure S1.** **Control effect of the VMSN and MSN on BLS.**

(A) The growth curves of *Xoc* strain in NA medium supplemented with 0.1 mg/mL VMSN and MSN were analyzed. (B) Phenotypes of BLS lesion expansion in rice plants following treatment with 0.1 mg/mL VMSN and MSN. (C) Statistics of lesion length in (B). The values shown are the means ± SD (n = 10). ***p ≤ 0.01,* ****p ≤ 0.001*; one-way ANOVA with post hoc Duncan’s multiple range test.

**
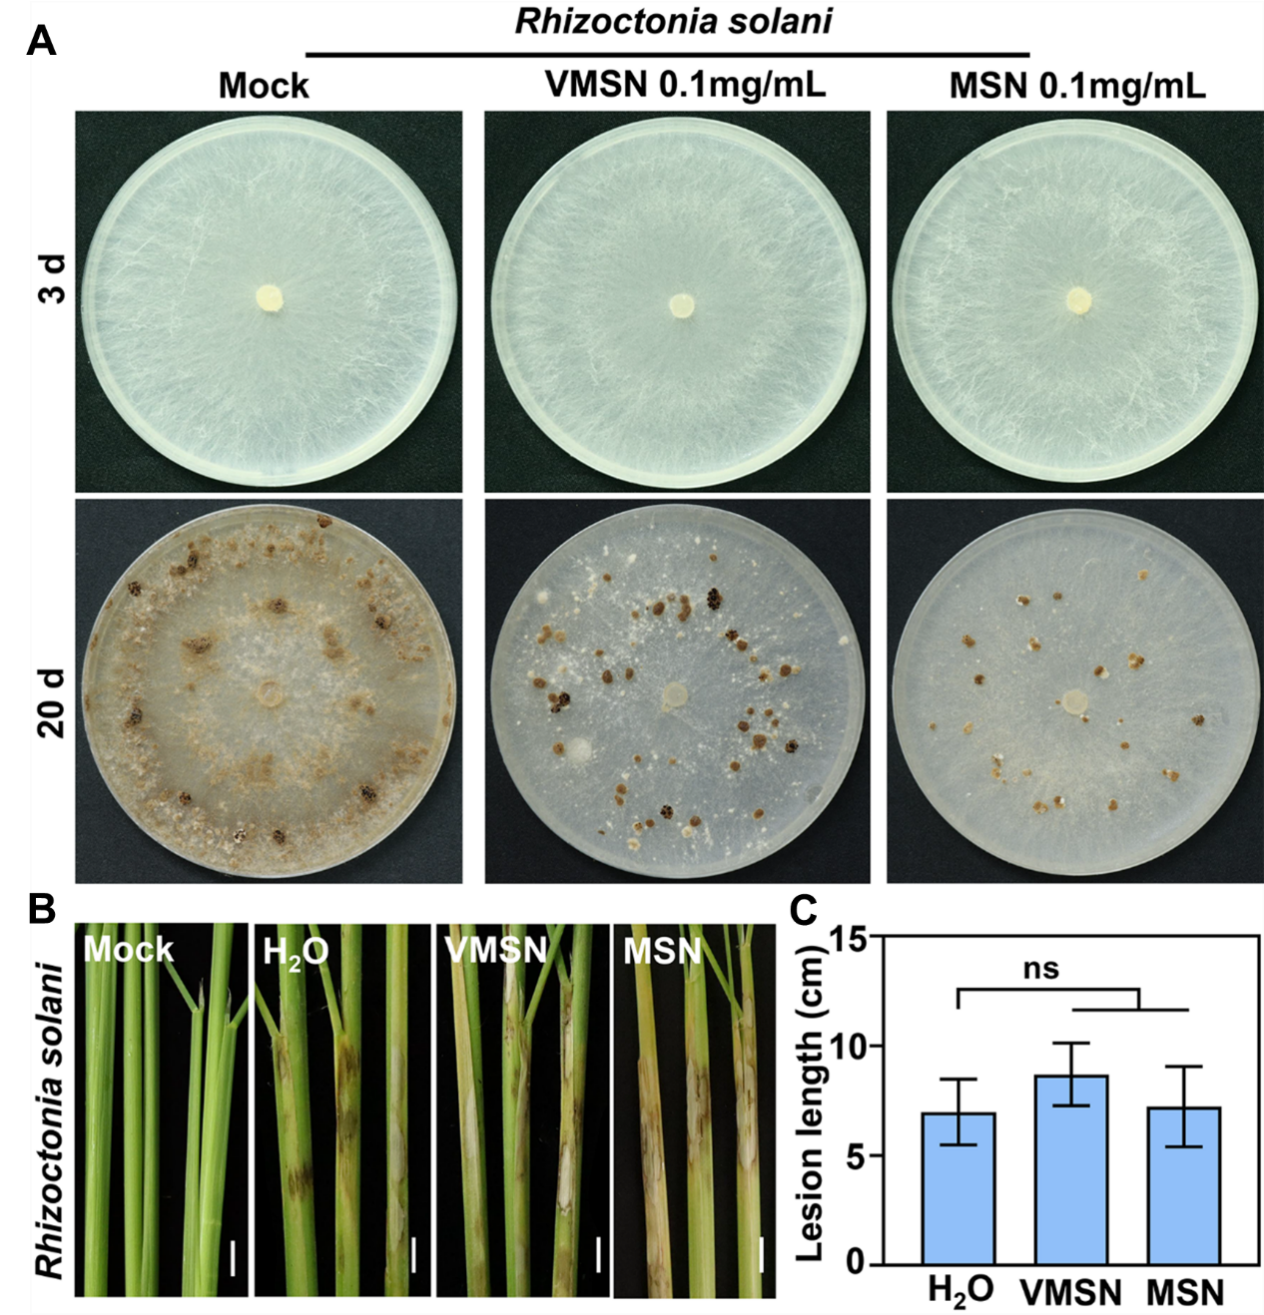
**

**Figure S2.** **Control effect of the VMSN and MSN on RSB.**

(A) The morphological features of *R. solani* hyphae and sclerotia were characterized on PDA cotained with 0.1 mg/mL of both VMSN and MSN. (B) Phenotypes of SHB lesion expansion in rice plants following treatment with 0.1 mg/mL VMSN and MSN. (C) Statistics of lesion length in (B). The values shown are the means ± SD (n = 10).ns: no significant difference; one-way ANOVA with post hoc Duncan’s multiple range test.

**
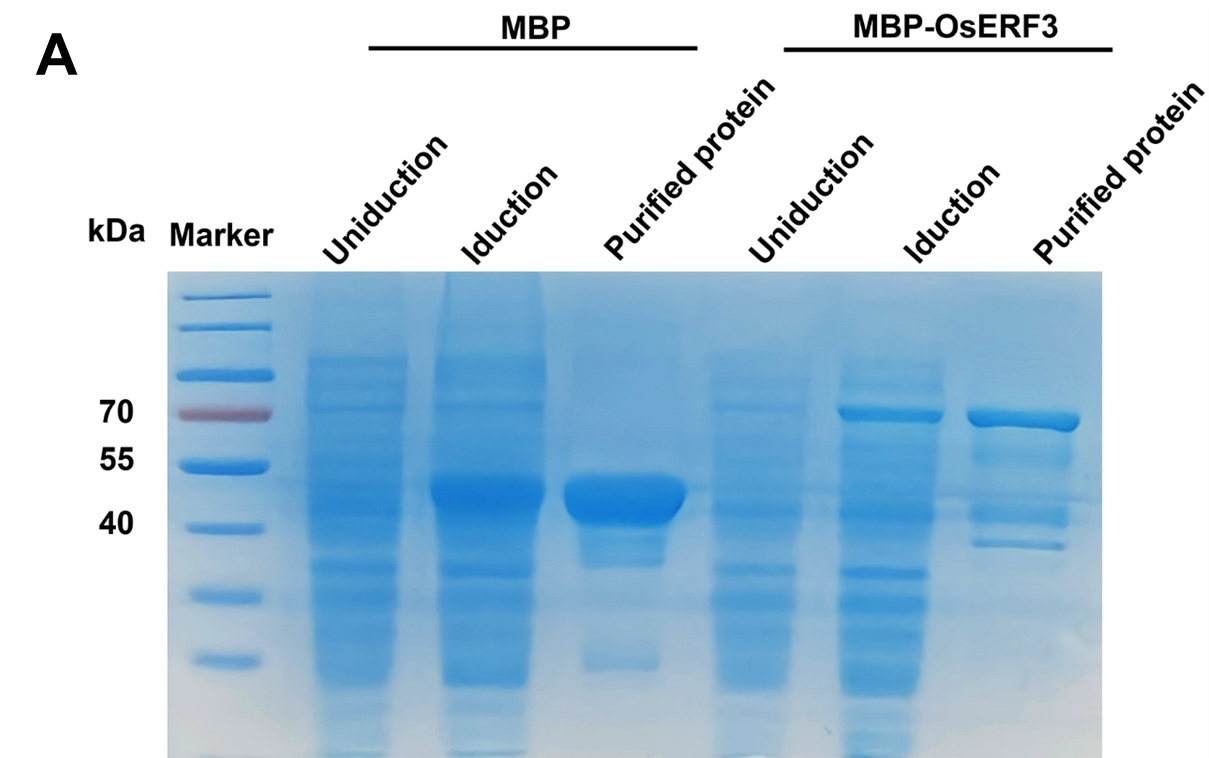
**

**Figure S3.** **Control effect of the VMSN and MSN on RSB.**

SDS-PAGE analysis with Coomassie Brilliant Blue staining was performed to analyze protein expression and purification. Samples included lysates from bacterial strains expressing the MBP and MBP-OsERF3 fusion proteins under uninduced and induced conditions, as well as the final purified protein sample.

**
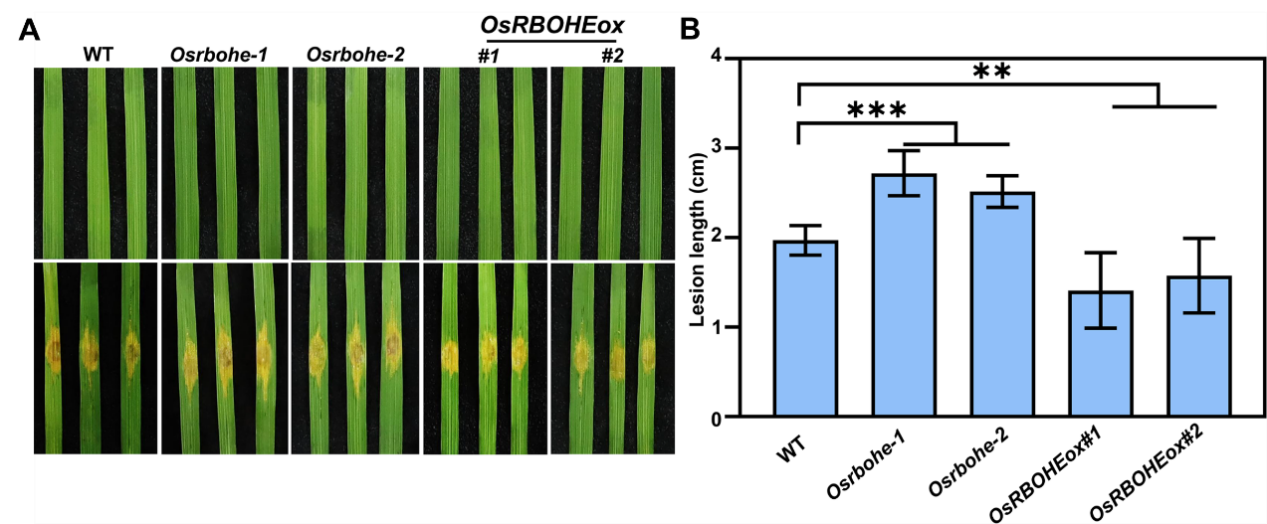
**

**Figure S4.** **Control effect of the VMSN and MSN on BLS.**

(A) The growth curves of *Xoc* strain in NA medium supplemented with 0.1 mg/mL VMSN and MSN were analyzed. Differences in growth among the treatment groups were compared using repeated-measures ANOVA. (B) Phenotypes of BLS lesion expansion in rice plants following treatment with 0.1 mg/mL VMSN and MSN. (C) Statistics of lesion length in (B). The values shown are the means ± SD (n = 10). ***p ≤ 0.01,* ****p ≤ 0.001*; one-way ANOVA with post hoc Duncan’s multiple range test.

**
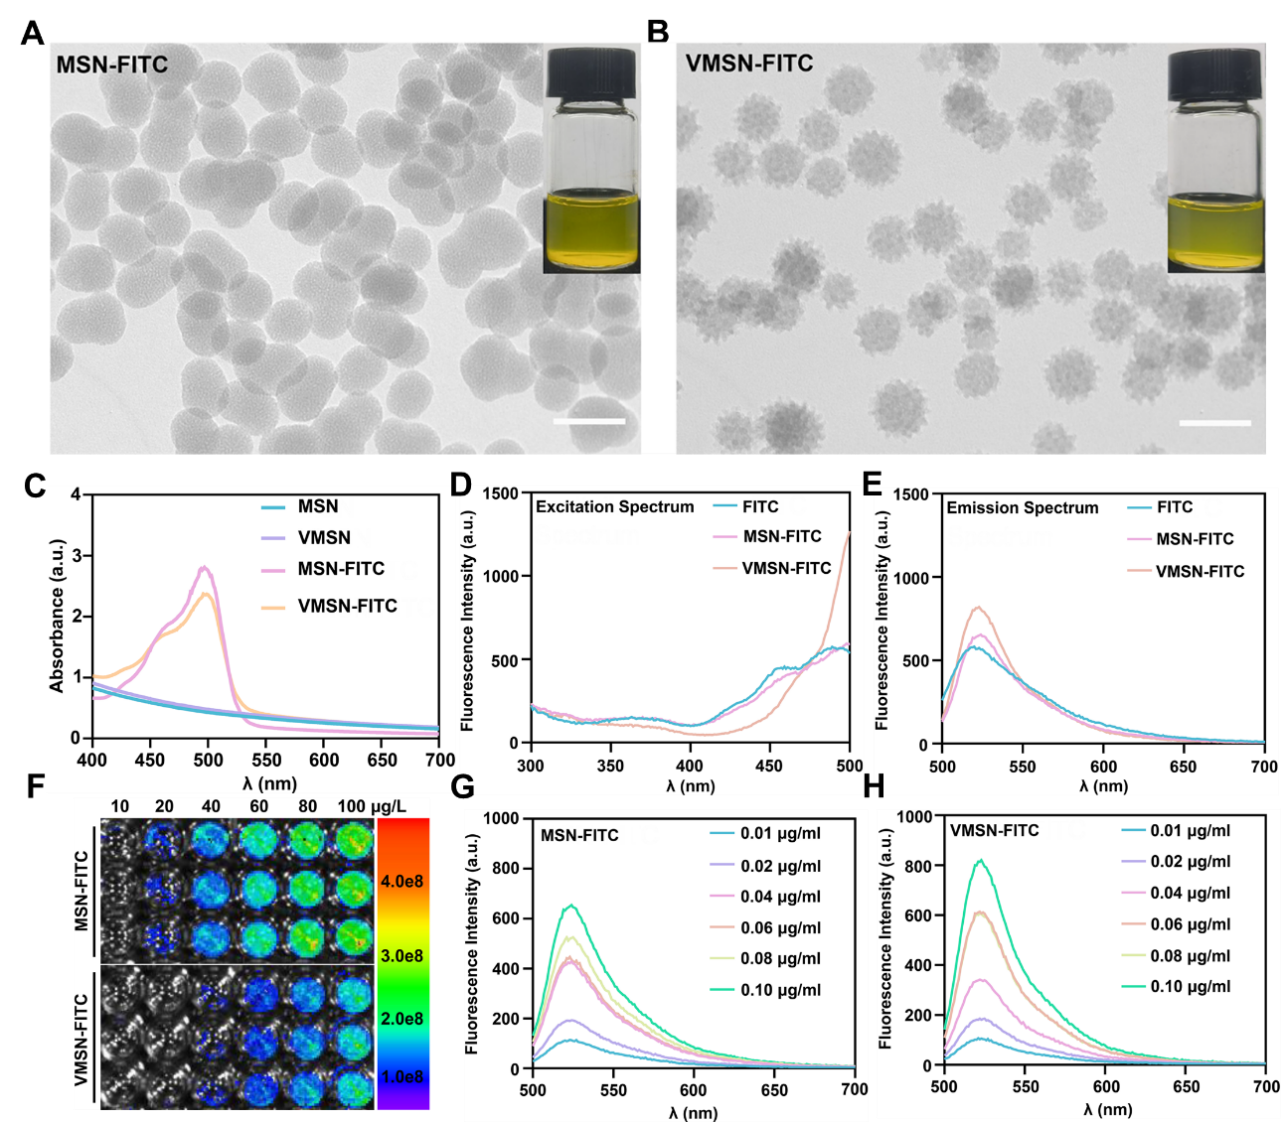
**

**Figure S5.** **Characteristics of the MSN-FITC and VMSN-FITC.**

(A-B) TEM images of MSN-FITC and VMSN-FITC, the insert images showed different nano-silicon in aqueous solution. (C) UV-vis spectrum of MSN, VMSN, MSN-FITC and VMSN-FITC in ethanol. (D-E) Fluorescence excitation spectrum (D) and emission spectrum (E) of FITC, MSN-FITC and VMSN-FITC in ethanol (Em: 520 nm, Ex: 300-500 nm; Ex: 490 nm, Em: 500-700 nm; 0.1 μg/mL FITC). (F) Fluorescence imaging pictures of MSN-FITC and VMSN-FITC. (G-H) Fluorescence intensity of MSN-FITC (G) and VMSN-FITC (H) with different concentrations in ethanal of (Ex: 490 nm, Em: 500-700 nm).


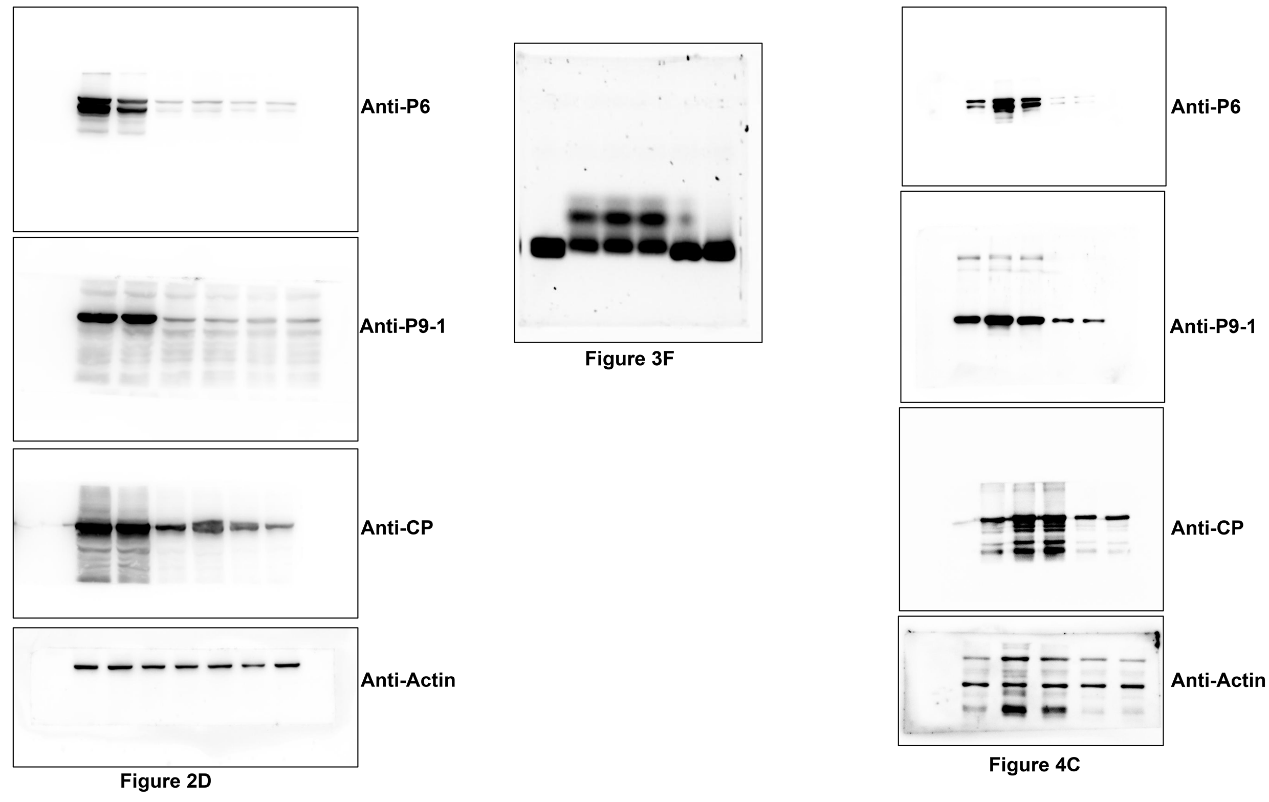


**Figure S6.** **Full uncropped images of the original gel and blot.**

Figure 2D, Figure 3F and Figure 4C Original Image

**Table S1 The predicted results of the *OsRBOHE* promoter**

| **Matrix ID** | **Name** | **Score** | **Start** | **End** | **Strand** | **Predicted sequence** |
| --- | --- | --- | --- | --- | --- | --- |
| MA1001.4 | MA1001.4.ERF076 | 12.903428 | 586 | 595 | ＋ | tagccgccac |
| MA0992.3 | MA0992.3.ERF4 | 12.609626 | 1884 | 1892 | － | ccgccgtcg |
| MA1006.1 | MA1006.1.ERF6 | 12.436645 | 2106 | 2115 | － | atgccggctc |
| MA0992.2 | MA0992.2.ERF4 | 11.950581 | 1882 | 1893 | － | tccgccgtcgga |
| MA0998.1 | MA0998.1.ERF096 | 11.025113 | 586 | 595 | ＋ | tagccgccac |
| MA1004.2 | MA1004.2.ERF13 | 10.786069 | 587 | 593 | ＋ | agccgcc |
| MA1005.1 | MA1005.1.ERF3 | 10.43057 | 587 | 594 | ＋ | agccgcca |
| MA0994.3 | MA0994.3.ERF8 | 10.178817 | 1884 | 1894 | ＋ | cgacggcggaa |
| MA1005.1 | MA1005.1.ERF3 | 10.103334 | 1884 | 1891 | － | cgccgtcg |

**Table S2.** **Sequences of the primers used in the study.**

| **Oligonucleotides** | | **Sequence (5’-3’)** |
| --- | --- | --- |
| **Primers used for q-PCR** | | |
| **OsRBOHA-qPCR-F** | | CTGTTTGCTTGTATGTAGGGGAGAGG |
| **OsRBOHA-qPCR-R** | | AGGGAGACACTGCTGGACATTGAAC |
| **OsRBOHB-qPCR-F** | | GCGAAGAGGGTGAGGAAGAGGC |
| **OsRBOHB-qPCR-R** | | CTTGAACGGAGCAGCACACCATC |
| **OsRBOHC-qPCR-F** | | GCTACTATCTGGAGGACAACTGGAAG |
| **OsRBOHC-qPCR-R** | | GAGTCTCAGCAGCCCCTTTTG |
| **OsRBOHD-qPCR-F** | | TGGAGCAACGCCTTTCATCAGC |
| **OsRBOHD-qPCR-R** | | TCAGCAACATCATTCATCACGCC |
| **OsRBOHE-qPCR-F** | | CCTCCTGGTGCTCGCCTACG |
| **OsRBOHE-qPCR-R** | | TGGGTAAATCGCTGCCTTGACG |
| **OsRBOHF-qPCR-F** | | CGGCGAGCAGCAACAAGAGG |
| **OsRBOHF-qPCR-R** | | CGACCTGGCATCACGCTCTTC |
| **OsRBOHG-qPCR-F** | | CTTCCTCTTCCTCGTCCGTCGC |
| **OsRBOHG-qPCR-R** | | TTGACAGCATAAGCATTTGACCGC |
| **OsRBOHH-qPCR-F** | | GGAGTGGTGGTAGGGGTGGCG |
| **OsRBOHH-qPCR-R** | | CGCACGAACCACCAGTAGTCCG |
| **OsRBOHI-qPCR-F** | | CCCGCTCAACCGCCTCACG |
| **OsRBOHI-qPCR-R** | | CGCCCTCGTCAGCCTCTCGC |
| **OsERF3-qPCR-F** | | CACACCCAAACCCAACCTCCC |
| **OsERF3-qPCR-R** | | CCCGGAACTCTCGAGCGG |
| **OsERF4-qPCR-F** | | GGAAGACGAGGAGGAGGAGGAG |
| **OsERF4-qPCR-R** | | CGTAGTCCATCTGCCTCATCGC |
| **OsERF6-qPCR-F** | | GCCGCATCCAAGAAGAGGTCC |
| **OsERF6-qPCR-R** | | CGAGCCACCACAAGCACTACCC |
| **OsERF8-qPCR-F** | | CTTCTGCTGCTGCTGCTGCG |
| **OsERF8-qPCR-R** | | CACCCACTTGCCCCACTTCC |
| **OsERF13-qPCR-F** | | GCAGACCAAGAATACGGCGGC |
| **OsERF13-qPCR-R** | | CCCAGCCACACCCTCTCGC |
| **OsERF076-qPCR-F** | | AGGGGGGTGAGGAAGCGGC |
| **OsERF076-qPCR-R** | | TGGTTCTGGCGAGCGGGC |
| **OsERF096-qPCR-F** | | GCCATCCTCAACTTCCCCAACG |
| **OsERF096-qPCR-R** | | TCAGCCTCTCCTTCTTCACCTCCC |
| **P10-qPCR-F** | | AAACAACCGACCAACAATCACA |
| **P10-qPCR-R** | | CAGTTTGTAATCTATCATGAAGTCGAG |
| **OsEF1a-F** | | GCACGCTCTTCTTGCTTTCACTCT |
| **OsEF1a-R** | | AAAGGTCACCACCATACCAGGCTT |
| **Primers used for SRBSDV detection** | | |
| **SRBSDV S10-F** | | CGCGTCATCTCAAACTACAG |
| **SRBSDV S10-R** | | TTTGTCAGCATCTAAAGCGC |
| **Primers used for EMSA** | | |
| **OsRBOHE probe 1-F** | | AlexaFlur680-GTGAGAATTTCTAGCCGCCACAACGAAC |
| **OsRBOHE probe 1-R** | | GTTCGTTGTGGCGGCTAGAAATTCTCAC |
| **specific competitor-F** | | GTGAGAATTTCTAGCCGCCACAACGAAC |
| **Non-specific competitor-F** | | ACAAGCTGGAGTACAACTACAACAGCCA |
| **Non-specific competitor-R** | | TGGCTGTTGTAGTTGTACTCCAGCTTGT |
| **Primers used for cloning** | | |
| **pMBP-OsERF3-F** | TATCGGAATTAATTCGGATCCGATGGTACAGCCAAAGAAGAAGTTTC | |
| **pMBP-OsERF3-R** | GTGGTGGTGGTGGTGCTCGAGTCAGATGACAAAGCTACCCTCTCC | |
| **pENTR-OsERF3-F** | CCGCGGCCGCCCCCTTCACCATGGTACAGCCAAAGAAGAAGTTTC | |
| **pENTR-OsERF3-R** | GGGTCGGCGCGCCCACCCTTTCAGATGACAAAGCTACCCTCTCC | |
| **pGreen-OsRBOHE Promote-F** | CTTGATATCGAATTCCTGCAGCTCATATTGGATTGTTATATAGACTCTCC | |
| **pGreen-OsRBOHE Promote-R** | TGTTTTTGGCGTCTTCCATGGCCCGGAACACGCAATGCC | |
